1 **Convergent approaches to delineate the metabolic regulation of tumor invasion by**  
2 **hyaluronic acid biosynthesis**

3

4 Adrian A. Shimpi<sup>1\*</sup>, Matthew L. Tan<sup>1\*</sup>, Michael Vilkhovoy<sup>2</sup>, David Dai<sup>2</sup>, L. Monet Roberts<sup>1, 2</sup>,  
5 Joe Kuo<sup>2</sup>, Lingting Huang<sup>2</sup>, Jeffrey D. Varner<sup>2</sup>, Matthew Paszek<sup>2,3</sup>, Claudia Fischbach<sup>1,3,†</sup>

6

7 <sup>1</sup>Nancy E. and Peter C. Meinig School of Biomedical Engineering, Cornell University, Ithaca,  
8 New York, 14853, USA

9 <sup>2</sup>Robert Frederick Smith School of Chemical and Biomolecular Engineering, Cornell University,  
10 Ithaca, New York, 14853, USA

11 <sup>3</sup>Kavli Institute at Cornell for Nanoscale Science, Cornell University, Ithaca, New York, 14853,  
12 USA

13 \*Contributed equally to this work

14

15 †Corresponding author:

16 Claudia Fischbach-Teschl

17 cf99@cornell.edu

18

19 **The authors declare no potential conflicts of interest.**

20

21

22 **Abstract**

23 Metastasis is the leading cause of breast cancer-related deaths and often driven by invasion and  
24 cancer-stem like cells (CSCs). Both the CSC phenotype and invasion have been associated with  
25 increased hyaluronic acid (HA) production. How these independent observations are connected,  
26 and which role metabolism plays in this process remains unclear due in part to the lack of  
27 convergent approaches that integrate engineered model systems, computational tools, and cancer  
28 biology. Using microfluidic invasion models, metabolomics, computational flux balance analysis  
29 (FBA), and bioinformatic analysis of patient data we investigated the functional links between the  
30 stem-like, invasive, and metabolic phenotype of breast cancer cells as a function of HA  
31 biosynthesis. Our results suggest that CSCs are more invasive than non-CSCs and that broad  
32 metabolic changes caused by overproduction of HA play a role in this process. Accordingly,  
33 overexpression of hyaluronic acid synthases (HAS) 2 or 3 induced a metabolic phenotype that  
34 promoted breast cancer cell stemness and invasion *in vitro* and upregulated a transcriptomic  
35 signature that was predictive of increased invasion and worse survival in patients. Collectively,  
36 this study suggests that HA overproduction leads to metabolic adaptations that help satisfy the  
37 energy demands necessary for 3D invasion of breast cancer stem cells further highlighting the  
38 importance of engineered model systems and multidisciplinary approaches in cancer research.

39

## 40 **Introduction**

41 Despite advancements in treatment options, breast cancer remains the second leading cause of  
42 cancer-related deaths in women<sup>1</sup>. Mortality in breast cancer is driven by metastasis and relapse,  
43 during which cancer cells in the primary tumor invade into surrounding tissues and disseminate  
44 into distant sites to form secondary tumors. The pathogenesis of metastasis can be attributed to  
45 intratumoral heterogeneity, where phenotypic diversity enables a subset of cells to become  
46 invasive and resistant to traditional therapies<sup>2,3</sup>. In particular, the emergence of cancer cells with  
47 stem-like properties (CSCs) contributes to metastasis because of their self-renewal and invasive  
48 properties<sup>4</sup>. CSCs are identified by their expression of stem cell markers (e.g. NANOG, SOX2,  
49 OCT4, aldehyde dehydrogenase [ALDH]) and influenced by features of the tumor  
50 microenvironment including extracellular matrix (ECM)<sup>5,6</sup>. For example, CSC invasion into the  
51 surrounding stroma is controlled by ECM microarchitecture and stiffness<sup>7,8</sup> including collagen  
52 fiber alignment at the tumor periphery<sup>7,9,10</sup>. However, the emergence and maintenance of the CSC  
53 phenotype and their consequences on 3D collagen invasion are poorly understood as studies often  
54 isolate tumor cells from the complex microenvironmental conditions that influence their behavior  
55 *in vivo*.

56  
57 One key component of the tumor microenvironment influencing tumor cell phenotype and  
58 invasion is hyaluronic acid (HA). While much prior work has focused on how HA secreted by  
59 stromal cells regulates tumorigenesis<sup>11-13</sup>, cancer cells themselves also produce HA. In fact,  
60 overproduction of HA by tumor cells enriches for a CSC phenotype<sup>14,15</sup> and correlates with worse  
61 patient prognosis<sup>11,16</sup>. Although several studies have delineated the specific signaling pathways by  
62 which HA modulates cell behavior<sup>15,17</sup>, excess production of HA also regulates tumor cells via

63 biophysical mechanisms<sup>18,19</sup>. For example, biosynthesis and pericellular retention of HA as part of  
64 the glycocalyx allows tumor cells to invade and extravasate more effectively<sup>20,21</sup>. However, which  
65 metabolic adaptations tumor cells may use to increase HA-mediated tumor cell invasion and the  
66 role cancer cell stemness plays in this process remains unclear.

67

68 Aberrant cellular metabolism is a hallmark of cancer that has been independently tied to increased  
69 tumor cell invasion, stemness, and HA biosynthesis. Therefore, we speculated that metabolism  
70 may serve as an overarching regulator of HA-mediated tumor cell invasion. Specifically, we  
71 hypothesized that metabolic adaptations increase cancer cell stemness, which phenotypically can  
72 more readily satisfy the energetic demands of 3D invasion. Prior findings suggest that CSCs  
73 exhibit metabolic phenotypes that are distinct from non-CSCs<sup>22-24</sup> and that effective tumor cell  
74 invasion through dense ECM requires metabolic adaptations including increased glucose uptake  
75 and ATP generation<sup>25,26</sup>. While increased glucose uptake due to aerobic glycolysis is a common  
76 feature of tumor cell metabolism, this typically results in the fermentation of glucose to lactate  
77 (known as the Warburg Effect) which produces ATP less efficiently than oxidative  
78 phosphorylation per glucose molecule. This energetically disadvantageous state must then  
79 encourage tumor cells to develop compensatory mechanisms to generate the necessary energy for  
80 3D invasion.

81

82 Because increased HA production of CSCs is known to direct intermediate products of glycolysis  
83 into the hexosamine biosynthetic pathway (HBP)<sup>17</sup> it is possible that the resulting metabolic  
84 rewiring enables their 3D invasion by providing alternative strategies for ATP production.  
85 However, identifying broad metabolic changes beyond conventional biochemical methods

86 requires integrating computational approaches that can model the flow of metabolites through  
87 relevant large-scale metabolic networks, while simulating a desired metabolic phenotype for  
88 subsequent experimental validation. Here, we integrate engineered cell lines, microfabricated  
89 culture models, and computational approaches including flux-balance-analysis (FBA) to  
90 investigate the interconnectedness of the tumor cell phenotype, HA production, and metabolism  
91 and its influence on cancer cell invasion. We demonstrate that metabolic adaptations associated  
92 with increased HA production promote a stem-like phenotype in cancer cells, which can more  
93 readily satisfy the energy demands necessary for 3D invasion. Bioinformatic analysis of clinical  
94 data from publicly available datasets further indicated that these changes correlated with increased  
95 invasive potential and worse survival in patients. Collectively, our results suggest that HA  
96 overproduction due to metabolic reprogramming negatively influences prognosis in breast cancer  
97 patients by altering invasion, and further motivate the need for utilizing a multidisciplinary toolset  
98 to study intratumoral heterogeneity and its role in invasion.

99

## 100 **Results**

### 101 *Cancer Stem-Like Cells Exhibit Increased Invasive Potential*

102 To investigate differences in invasion between CSCs and their non-differentiated counterparts, we  
103 utilized the CSC reporter cell line GFP-NANOG MDA-MB-231 in which green fluorescent  
104 protein (GFP) expression is controlled by the NANOG promoter<sup>27</sup> (Fig. 1a). Using fluorescence-  
105 activated cell sorting (FACS) GFP-NANOG MDA-MB-231 cells were sorted into GFP<sup>Null</sup>, GFP<sup>Low</sup>  
106 (bottom 5% GFP expressing), and GFP<sup>High</sup> (top 5% GFP expressing cells) populations to enrich  
107 for different stem-like states (Fig. 1a) whose phenotype was maintained over 5 days of culture  
108 (Supplementary Fig. 1). Moreover, the GFP<sup>High</sup> cell population proliferated more slowly than the

109 non-CSC GFP<sup>Null</sup> population, consistent with a more quiescent phenotype (Fig. 1b). To study  
110 potential differences in the invasive phenotype of these different cell populations, we monitored  
111 tumor cell invasion in response to a morphogen gradient using a microfluidic collagen type I  
112 hydrogel model (Fig. 1c). In this setup, GFP<sup>High</sup> NANOG MDA-MB-231 cells invaded into the 3D  
113 fibrillar collagen hydrogel region (Fig. 1d) of the device more readily than their less stem-like  
114 counterparts, validating that CSCs exhibit increased 3D invasive potential (Fig. 1e). Cell migration  
115 and invasion are energetically intensive processes requiring increased metabolic consumption<sup>28</sup>.  
116 Accordingly, inhibiting energy production with the glycolysis inhibitor 2-deoxyglucose (2-DG)  
117 reduced both collagen hydrogel invasion and random 2D migration of unsorted GFP-NANOG  
118 MDA-MB-231 cells (Fig. 1f,g). These results indicate that CSCs exhibit increased invasive and  
119 migratory potential in our experimental setup that was dependent on glycolytic metabolism.

120

### 121 *Cancer Stem-Like Cells Have Altered Metabolism*

122 To characterize the metabolic phenotype of cancer cells as a function of their stem-like phenotype,  
123 extracellular metabolite production and consumption rates were measured in sorted GFP-NANOG  
124 cells (Fig. 2a,b). The more stem-like cells consumed more glucose and produced more lactate  
125 relative to their non-stem-like counterparts indicative of increased glycolysis (Fig. 2a). Real-time  
126 metabolic analysis with the Agilent Seahorse (Seahorse) Analyzer of extracellular acidification  
127 rate (ECAR) and oxygen consumption rate (OCR) further suggested that CSCs not only exhibited  
128 increased glycolysis, but also oxidative phosphorylation (Fig. 2b, Supplementary Fig. 2).  
129 Accordingly, culturing in glucose-free media decreased the percentage of GFP<sup>High</sup> cells relative  
130 to media containing physiological levels of glucose (Fig. 2c). This approach also decreased the  
131 ALDH bright (ALDH<sup>B<sub>r</sub></sup>) fraction (a marker for breast CSCs<sup>29,30</sup>) of wildtype MDA-MB-231 cells

132 confirming that our results were not an artefact of the GFP-NANOG reporter cell line. Moreover,  
133 inhibition of glycolysis by 2-DG reduced the GFP<sup>High</sup> population further corroborating that the  
134 CSC phenotype is intimately linked to glucose metabolism (Fig. 2d).

135

136 As increased HA production has been associated with both metabolic reprogramming and the CSC  
137 phenotype<sup>17,31</sup>, we next assessed how HA production correlates with the CSC phenotype.  
138 Immunofluorescence (IF) image analysis identified that GFP expression in GFP-NANOG MDA-  
139 MB-231 cells positively correlated with the amount of cell surface-associated HA (Fig. 2e). These  
140 differences were likely due to changes in HA biosynthesis and subsequent cell surface retention as  
141 analysis of secreted HA by ELISA indicated low levels across all experimental conditions that  
142 were not significantly different from each other although more stem-like cells seemed to secrete  
143 slightly less HA (Supplementary Fig. 3a). Together, these results suggest that more stem-like cells  
144 exhibit increased glucose metabolism relative to their less stem-like counterparts and that these  
145 changes correlate with elevated levels of cell surface-associated HA.

146

#### 147 *Hyaluronic Acid Production Correlates with Stemness*

148 To better quantify the relationship between glucose metabolism, cell surface-associated HA, and  
149 stemness, GFP-NANOG MDA-MB-231 cells were stained for HA and then subjected to flow  
150 cytometry and targeted metabolomics. Consistent with the IF results, the amount of cell surface-  
151 associated HA directly correlated with GFP expression levels (Fig. 3a). Importantly, sorting the  
152 GFP-NANOG MDA-MB-231 cells into high and low HA producing cells for targeted  
153 metabolomics revealed broad changes of intracellular metabolites with hierarchical clustering  
154 separating the two HA production phenotypes (Fig. 3b). In particular, both upper glycolytic and

155 tricarboxylic acid (TCA) cycle metabolites such as glucose-6-phosphate (G6P), fructose-6-  
156 phosphate (F6P), oxaloacetate (OAA), and citrate (CIT) were increased in the highly HA  
157 producing cells (Fig. 3c). Combining these results with the broad metabolic alterations of CSCs  
158 described above (Fig. 2), these data suggest a direct link between glycolysis-dependent HA  
159 synthesis and the CSC phenotype (Fig. 3d). To more directly test how HA synthesis affects  
160 stemness, GFP-NANOG MDA-MB-231 cells were cultured with the HA synthesis inhibitor 4-  
161 methylumbelliferone (4-MU, 0.5 mM). These results trended towards a decreased fraction of stem-  
162 like GFP<sup>High</sup> cells consistent with previous studies on stemness and invasion<sup>15,20</sup> (Supplementary  
163 Fig. 3b).

164

165 To more directly determine if increasing production of HA promotes stemness, HAS2 and HAS3  
166 were stably overexpressed in MDA-MB-231 and the non-malignant breast epithelial cell line  
167 MCF10A. While HA is synthesized by three HAS isoforms (HAS1, 2, 3), HAS 1 varies in HA  
168 synthesis and secretion rate from HAS 2 and 3. In contrast, HAS2 and HAS3 exhibit similar  
169 sensitivities and responses to precursor availability and thus were used here<sup>32-34</sup>. Overexpression  
170 of HAS2/3 increased the defining characteristic of CSCs in both cell lines. More specifically,  
171 overexpression of HAS2/3 increased MDA-MB231 self-renewal as measured through sphere  
172 formation in a limited dilution assay (Fig. 3e, Supplementary Fig. 4a,b) and increased the fraction  
173 of CD44<sup>+</sup>/CD24<sup>-</sup> MCF10A cells, which characterizes an invasive breast CSC population with more  
174 mesenchymal characteristics<sup>35,36</sup> (Fig. 3f, Supplementary Fig. 4d). This population could not be  
175 assessed in HAS overexpressing MDA-MB-231 as this cell line contains an intrinsically high  
176 fraction of CD44<sup>+</sup>/CD24<sup>-</sup> cells (>85%), making changes difficult to quantify<sup>37,38</sup> (Supplementary  
177 Fig. 4c). Finally, HAS3 overexpression also trended towards an increase in the ALDH<sup>Br</sup> fraction



178 of MCF10A (Supplementary Fig. 4e). Together, these results suggest that HA overproduction  
179 increases stem-like cell properties in breast cancer cells regardless of cell line and HAS2/3 isoform.

180

181 *Increased HA Production by CSCs is Associated with Increased Glucose Conversion and ATP*  
182 *Production*

183 Given our results that metabolic reprogramming of CSCs supports their energy demands during  
184 invasion (Fig. 2) and that a more stem-like phenotype is associated with increased HA production  
185 (Fig. 3), we speculated that increased HA production promotes a more energetic CSC phenotype.

186 Probing the individual contribution of HA biosynthetic pathways to the metabolic state of CSCs  
187 solely by measuring different metabolite levels, however, is challenging given the

188 interconnectedness of most metabolic pathways. To circumvent these limitations and delineate the  
189 contribution of HA biosynthesis to CSC metabolism more directly, a flux balance analysis (FBA)

190 model was constructed. FBA is a widely utilized mathematical approach to model the flow of  
191 metabolites (flux) through a genome-scale network of metabolic pathways, including glycolysis,

192 oxidative phosphorylation, hexosamine biosynthesis, and amino acid consumption<sup>39</sup>, and has been  
193 successfully used to investigate cancer metabolism<sup>40,41</sup>. In contrast to traditional metabolomics,

194 FBA also enables the simulation of a desired metabolic phenotype by adjusting model parameters  
195 such as the objective function and flux constraints. To develop the model for our study,

196 extracellular metabolomics of GFP<sup>High</sup> and GFP<sup>Null</sup> cells were performed over 72 hours to define  
197 metabolite consumption/production profiles used to constrain flux values for more and less stem-

198 like MDA-MB-231 breast cancer cells, respectively (Fig. 4a). Additionally, the objective function  
199 of the FBA model was set to maximize HA synthesis to study both the capacity of CSCs and non-

200 CSCs to produce HA and the associated changes in metabolic flux. Results from the FBA model

201 indicated that the more stem-like cells (GFP<sup>High</sup>) increased flux through the upper stages of  
202 glycolysis (i.e., conversion of glucose to fructose-6-phosphate), ATP generation, lactate  
203 production/secretion, and glutamine uptake relative to the non-stem-like cells (GFP<sup>Null</sup>) (Fig. 4b,  
204 Supplementary File 1). Additionally, the FBA model indicated increased flux through all HA  
205 synthesis intermediate steps for the GFP<sup>high</sup> cells relative to the GFP<sup>null</sup> cells (Fig. 4c). Collectively,  
206 these data suggest that the increased capacity of CSCs to synthesize HA is related to increased  
207 glucose conversion but simultaneously allows these cells to produce ATP more efficiently. To  
208 confirm the predictive value of the FBA model, a Seahorse real-time ATP rate assay was  
209 performed. This analysis verified that the mitochondrial and overall ATP production rate was  
210 increased in GFP<sup>High</sup> versus GFP<sup>Null</sup> cells (Fig. 4 d,e). Together, these findings suggest that the  
211 metabolic phenotype of more stem-like cancer cells leading to increased HA biosynthesis  
212 promotes ATP production by these cells. FBA models are suitable for predicting these changes.

213

214 *Metabolic Changes resulting from Increased HA Production Stimulate a Stem-like Breast Cancer*  
215 *Cell Phenotype to Promote Invasion.*

216 Our aforementioned results suggest functional links between the stem-like and invasive phenotype  
217 of tumor cells (Fig. 1), CSCs and metabolism (Fig. 2), CSCs and HA (Fig. 3), and HA and  
218 metabolism (Fig. 4). However, whether these single observations are mechanistically connected  
219 remained to be determined. Therefore, we next hypothesized that the metabolic phenotype induced  
220 by HA overproduction leads to changes in energy production that increase the stem-like phenotype  
221 of breast cancer cells to promote invasion. Indeed, Seahorse analysis revealed that MCF10A and  
222 MDA-MB-231 cells overexpressing HAS2 and HAS3 had increased ECAR compared to their  
223 parental controls suggesting an increase in glycolytic energy production (Fig. 5a). Interestingly,

224 OCR was unchanged in HAS2/3-overexpressing MCF10A but increased in HAS2/3-  
225 overexpressing MDA-MB-231 cells (Supplementary Fig. 5a), consistent with an increase in OCR  
226 in GFP<sup>High</sup> vs. GFP<sup>Low</sup> and GFP<sup>Null</sup> MDA-MB-231 (Fig. 2b). Treatment with 2-DG decreased both  
227 cell surface-associated and secreted HA in MCF10A cells (Supplementary Fig. 5b, c). Notably, 2-  
228 DG treatment of MCF10A cells decreased the CD44<sup>+</sup>/CD24<sup>-</sup> fraction in the HA overproducing  
229 cells but had no effect on the parental control cells suggesting that the enhanced glycolysis  
230 associated with HA overproduction is critical to maintaining stemness (Fig. 5b). Furthermore, HA  
231 overproduction increased both total and glycolytic ATP production (Fig. 5c, Supplementary Fig.  
232 5d) that 2-DG reversed to similar levels as in MCF10A control cells (Fig. 5c). A similar trend was  
233 noted for MDA-MB-231 cells, although 2-DG decreased glycolytic ATP production only in the  
234 HAS3 overexpressing cells. Overexpression of HAS2/3 also increased invasion of both MCF10A  
235 and MDA-MB-231 (Fig. 5d, e), consistent with their increased stem-like phenotype (Fig. 3d, e).  
236 This effect was inhibited by 2-DG treatment, implicating a functional consequence of HA-  
237 mediated stemness and metabolism in tumor cell invasion (Fig. 5d, e). As 2-DG treatment did not  
238 affect the ATP production rate in parental cells (Fig. 5c), these changes in invasion can be  
239 attributed to differences in metabolism rather than compromised cell viability. Together this data  
240 suggests that HA overproduction induces a glycolytic phenotype that is crucial for CSC-mediated  
241 invasion.

242

### 243 *HA Overproduction Transcriptome Changes Predict Worse Patient Survival*

244 As our data implied that HAS2 and 3 overexpression induced more invasive tumor cell phenotypes  
245 we next tested if and how these findings may correlate with differences in clinical prognosis. To  
246 this end, RNA sequencing was conducted on the MCF10A cells overexpressing HAS2 and HAS3

247 and their parental control to identify transcriptional changes that would allow us to interrogate the  
248 contribution of HA overproduction to stemness, invasion, and patient outcomes. Principle  
249 component analysis (PCA) and hierarchical clustering indicated that the transcriptome of HA  
250 overproducing cells differed significantly from their parental control (Fig. 6a, b, Supplementary  
251 Fig. 6a, Supplementary File 2). Gene set enrichment analysis (GSEA) with the Hallmarks gene  
252 sets from the Molecular Signature Database revealed enrichment of a wide range of pathways for  
253 both HAS2 and HAS3-overexpressing cells, including those previously associated with stemness  
254 and invasion such as NF- $\kappa$ B<sup>42</sup>, hypoxia<sup>8</sup>, PI3K signaling<sup>43</sup>, IL6-STAT3 signaling, and reactive  
255 oxygen species<sup>22,23</sup> (Fig 6c). Since HIF1 $\alpha$  signaling has been previously implicated in an HA-  
256 dependent increase in the CSC phenotype<sup>17</sup>, we performed GSEA for HIF1 $\alpha$  target genes<sup>44-48</sup>.  
257 Interestingly, neither HAS2 nor HAS3 transcriptomes were enriched for HIF1 $\alpha$  target genes (Fig.  
258 6d), which have previously been suggested as drivers of HA-dependent stemness<sup>17</sup>. These results  
259 further support our findings that the cellular phenotypes investigated in this study are due to  
260 broader metabolic and energetic changes and cannot be attributed to glycolysis-driven changes in  
261 hypoxia-related signaling.

262

263 To determine the clinical relevance of our findings, a 72-gene signature was generated from the  
264 genes upregulated in both HAS2 and HAS3-overexpressing cells (log<sub>2</sub>-fold change > 1, p-value <  
265 0.05) compared to their parental control (Fig. 6e, Supplementary Table 1). Overrepresentation  
266 analysis of this gene signature revealed no significant enrichment of genes associated with most  
267 metabolic pathways from the KEGG database (Supplementary Fig. 6b). While surprising these  
268 results can be explained by the fact that metabolism is significantly regulated by posttranscriptional  
269 changes<sup>49,50</sup>. Subsequently, we calculated enrichment scores for this HA overproduction gene

270 signature and a curated list of gene signatures involved in migration, cytoskeleton dynamics, and  
271 metabolism (Supplementary File 3, Supplementary Fig. 7a) using single sample GSEA  
272 (ssGSEA)<sup>51</sup> for chemotherapy-naïve patients in the METABRIC cohort. Tumorous tissue from  
273 patients enriched for our HA overproduction signature were simultaneously enriched for several  
274 migration and actin cytoskeleton gene sets after accounting for random associations suggesting  
275 increased tumor invasion in these patients. Metabolic gene sets except for glycosaminoglycan  
276 synthesis were not enriched in patients consistent with our findings that metabolic pathways were  
277 not overrepresented in our HA production signature nor enriched by both HAS2/3 overexpression  
278 in MCF10A cells (Fig. 6f, Supplementary Fig. 6b, Supplementary Fig. 7b,c). Importantly, our HA  
279 overproduction signature also predicted worse patient survival consistent with their increased  
280 expression of invasion-related gene sets (Fig. 6f,g). Gene signatures specific to upregulation of  
281 either HAS2 or HAS3 also predicted worse patient survival that was not seen in the parental control  
282 (Supplementary Fig. 6c). Collectively, our results suggest that genes associated with increased HA  
283 biosynthesis correlate with an enrichment of migratory genes and predict worse patient survival  
284 regardless of HAS2/3 isoform and transcriptional regulation of metabolic gene sets.

285

## 286 **Discussion**

287 Although CSCs have been associated with HA production and altered metabolism, the exact nature  
288 of these connections to tumor heterogeneity and consequences on tumor cell invasion remain  
289 unclear. Because of the breadth of expertise required to probe each of these aspects, it is infeasible  
290 to rely on a single model system or analytical technique to perform a comprehensive investigation  
291 of these connections. Furthermore, the systems used must be compatible to enable a holistic  
292 evaluation of these aspects. Here, we have used a suite of multidisciplinary approaches that include

293 engineered cell lines, *in vitro* 3D cell culture models, computational metabolic modeling, and  
294 genomic tools to uncover the relationship between tumor cell phenotype, HA production,  
295 metabolic reprogramming, and 3D invasion. We demonstrate that CSCs can increase glycolytic  
296 and oxidative metabolism simultaneously and that the resulting changes in HA production support  
297 3D invasion by supporting more efficient ATP production. Moreover, we identified that these  
298 cellular changes correlated with a gene expression signature that was predictive of patient survival.

299

300 Our data suggests that cell states associated with increased glycolysis enrich for highly invasive,  
301 HA-producing CSCs. Interestingly, HA produced by CSCs is primarily retained on the cell surface  
302 rather than excreted into the surrounding environment (Fig. 3, Supplementary Fig. 3).  
303 Consequentially, the retention of HA on the cell surface contributes to glycocalyx thickness whose  
304 biophysical properties impact the interactions between cells and their surrounding environment  
305 including cell-extracellular matrix interactions necessary for migration<sup>18,52</sup>. In particular, HA-  
306 dependent changes of the glycocalyx can promote adhesion-independent or ameboid migration by  
307 altering the friction required for force generation against extracellular structures<sup>53</sup>, which may  
308 further decrease the energy needed for migration. Alternatively, changes in glycocalyx thickness  
309 impact surface receptor diffusion patterns and accessibility to impact both adhesion-mediated and  
310 receptor tyrosine kinase-mediated signaling<sup>54-56</sup>. Further studies to delineate the contributing  
311 biophysical properties are needed to determine the influence of HA on predominant migration  
312 mode.

313

314 Throughout the metastatic cascade, HA has been implicated in promoting invasive phenotypes and  
315 to support survival of circulating cells in the vasculature<sup>19-21</sup>. While HA-dependent changes of

316 cancer malignancy and stemness have been primarily attributed to upregulation of HAS2<sup>15,31</sup>, our  
317 findings indicate that HAS3 similarly promotes a stem-like state (Fig. 3). Indeed, our results that  
318 2-DG inhibited the stem-like phenotype in both HAS2/3-overexpressing mammary epithelial cells  
319 suggests that the metabolic reprogramming enacted by HA overproduction may be a central  
320 regulator of the tumor stem-like phenotype (Fig. 5b). Interestingly, exogenous degradation of HA  
321 produced by cancer cells promotes glucose uptake that can further promote migration<sup>56</sup>. This  
322 mechanism possibly provides a positive feedback mechanism by which increased HA production  
323 regardless of HAS isoform stimulates 3D invasion. Further studies are necessary to decouple the  
324 metabolic programming associated with HA production and degradation on the CSC phenotype.

325

326 To interrogate alterations in other metabolic pathways associated with glycolysis and oxidative  
327 phosphorylation, we utilized FBA to predict changes in metabolic fluxes induced by stemness.  
328 FBA is especially proficient in enabling the study of cancer metabolism as it simulates metabolic  
329 phenotypes based on real-world constraints such as cell growth rate and glucose uptake<sup>39,57</sup>. The  
330 FBA model developed here indicated that stem-like cells exhibited an increased capacity for HA  
331 production, and that this increase in HA production was associated with broad metabolic  
332 alterations. Interestingly, our model suggested that although the conversion of glucose to pyruvate  
333 is decreased in stem-like cells when maximizing HA production, the production of both lactate  
334 and acetyl-CoA from pyruvate is increased. An alternative source of pyruvate are the malic  
335 enzymes, which convert malate to pyruvate while producing the reducing agent NADPH<sup>58</sup>. Indeed,  
336 our FBA model indicated an increase in the flux through malic enzyme 2 (ME2) (Supplementary  
337 File 1), which has been previously associated with the loss of cellular senescence and increased  
338 tumorigenesis<sup>59,60</sup>. Although any connection with ME2 will need to be experimentally verified in

339 future experiments, the FBA model developed here was able to provide additional insights into the  
340 metabolic alterations associated with stemness-related HA production.

341  
342 The energetic demands associated with HA-mediated invasion can induce broad metabolic  
343 changes. For example, increased HA production rapidly depletes UDP-sugar substrates, which  
344 cancer cells may compensate for by increasing glycolysis to maintain flux into the HBP and thus,  
345 the pool of UDP-sugars<sup>17</sup>. Our FBA model corroborates this phenomenon and provides further  
346 insight into metabolic states associated with CSCs such as an increased HA production capacity.  
347 The resulting metabolic phenotypes associated with overexpressing HAS2 or HAS3 in cells  
348 suggest that the glycolytic demand dominates over possible changes in oxidative metabolism  
349 previously associated with stemness<sup>23,61,62</sup>. Furthermore, our finding that HA overproduction  
350 induces phenotypic and transcriptomic changes that correlate with invasion may help explain why  
351 glycolytic, mesenchymal breast CSCs localize to the leading edge of tumors and worsen patient  
352 prognosis<sup>23,36</sup>. Together, these results suggest that HA production enables a more invasive,  
353 malignant CSC metabolic phenotype.

354  
355 Transcriptomic analysis of HAS2 and HAS3 overexpressing MCF10As indicated an enrichment  
356 of multiple stemness-associated gene sets (e.g. IL6-JAK-STAT3 signaling and hypoxia), but  
357 metabolic genes were not differentially expressed. This discrepancy with our experimental  
358 observations may be explained by how metabolic changes are not only regulated transcriptionally  
359 but also by enzyme activity levels, localization, and substrate availability<sup>49,50,63,64</sup>. Furthermore,  
360 cytoskeletal rearrangement, which is critical for invasion, can independently control glycolytic  
361 flux by mediating enzyme degradation<sup>65</sup> or sequestration<sup>50</sup>. Our results suggest that the glycolytic



362 CSC phenotype associated with HA overproduction is not regulated transcriptionally, but whether  
363 this is enacted by cytoskeletal dynamics or changes in the relative activity of different metabolic  
364 enzymes requires further investigation.

365

### 366 **Acknowledgements**

367 Thank you to all members of the Fischbach lab for valuable feedback and discussion of the  
368 research. The authors would also thank Dr. Andrea Di Micheli, David McKellar, and Dr. Ben  
369 Cosgrove for assistance with RNA-sequencing data processing. The work described was supported  
370 by National Cancer Institute through the Center on the Physics of Cancer Metabolism  
371 (1U54CA210184), the National Science Foundation (NSF) through Graduate Research Fellowship  
372 Program awarded to A.A.S and L.M.R. (DGE-1650441), the U.S. Department of Education  
373 through the Graduate Assistance in Areas of National Need (GAANN) Fellowship awarded to  
374 M.L.T., the Breast Cancer Coalition of Rochester, and the Cornell NanoScale Science &  
375 Technology Facility (CNF), a member of the National Nanotechnology Coordinated Infrastructure  
376 (NNCI) supported by the National Science Foundation (Grant NNCI-2025233). This work utilized  
377 facilities at the Cornell Institute of Biotechnology including the Cornell University Biotechnology  
378 Resource Center (BRC) Imaging Facility (RRID:SCR\_021741) for image acquisition using the  
379 Zeiss LSM 710 Confocal Microscope (NIH 1S10RR025502), the BRC Genomics Facility  
380 (RRID:SCR\_021727) for sequencing, and the BRC Flow Cytometry Facility  
381 (RRID:SCR\_021740) for cell sorting with BD Biosciences FACS Aria Fusion. Mass spectrometric  
382 analysis of targeted metabolomics was performed at the Weill Cornell Medicine Proteomics and  
383 Metabolomics Core Facility.

384

## 385 **Author Contributions**

386 A.A.S., M.L.T., and C.F. designed the study. A.A.S. and M.L.T. conducted most of the  
387 experiments. M.V. and D.D. conducted extracellular metabolomics for FBA analysis. L.M.R. and  
388 M.P. performed FACS for HA production. J.K., L.H., and M.P. generated plasmids for HAS  
389 overexpression. L.M.R. and A.A.S. generated cell lines. J.V. and M.L.T. performed FBA analysis.  
390 A.A.S., M.L.T., and C.F. analyzed the data and wrote the manuscript. All authors discussed the  
391 results and commented on the manuscript.

392

## 393 **Materials and Methods**

### 394 *Cell Culture*

395 MCF10A (ATCC) cells were cultured in DMEM/F12 supplemented with 5% Horse Serum, 1%  
396 penicillin/streptomycin, 10 µg/mL Insulin, 0.5 µg/mL Hydrocortisone, 100 ng/mL Cholera toxin,  
397 and 20 ng/mL human epidermal growth factor (EGF). MDA-MB-231 (ATCC) and the GFP-  
398 NANOG MDA-MB-231 (a kind gift from Dr. Ofer Reizes<sup>27</sup>) cells were cultured in DMEM  
399 supplemented with 10% FBS and 1% penicillin/streptomycin. HAS overexpressing cells were  
400 cultured in their respective medias containing 1 µg/mL doxycycline (Santa Cruz Biotechnology).  
401 For glycolytic inhibition studies, cells were treated with media containing 2-deoxyglucose  
402 (MilliporeSigma) matching the glucose concentration in the media (25mM or 20mM for DMEM,  
403 DMEM/F12 respectively) for 24 hours unless otherwise noted.

404

### 405 *Generated Cell Lines*

406 cDNAs for human HAS2 and HAS3 were generated and cloned into the lentiviral vector pLV  
407 HygroR tetOn to create stably transduced, tetracycline-inducible MCF10A cell lines as previously

408 described<sup>52</sup>. cDNAs for human HAS2 and HAS3 were also fabricated and inserted into a  
409 tetracycline-inducible PiggyBac expression vector to generate pPB huHAS2-IRES2-mScarlet-  
410 IRES2-NeoR and pPB huHAS3-IRES2-mScarlet-IRES2-NeoR through custom gene synthesis  
411 (Twist Bioscience). Generation of the MDA-MB-231 HAS overexpressing cells was conducted  
412 using either the pPB huHAS2-IRES2-mScarlet-IRES2-NeoR or pPB huHAS3-IRES2-mScarlet-  
413 IRES2-NeoR or with the Piggybac transposase using the Nucleofector Cell Line Kit V (Lonza).  
414 Stably transfected cells were selected using 1 µg/mL puromycin (MilliporeSigma) or 800 µg/mL  
415 G418 (ThermoFisher). MDA-MB-231 HAS overexpressing cells were then sorted post-selection  
416 on mScarlet expression levels.

417

#### 418 *FACS and Flow Cytometry*

419 GFP-NANOG MDA-MB-231 cells were trypsinized and resuspended at  $10 \times 10^6$  cells/mL in FACS  
420 buffer (2.5% FBS/PBS, 2mM EDTA) and processed on the BD FACSAria Fusion Cell Sorter. The  
421 top 5% and bottom 5% of the GFP+ fraction were designated as GFP<sup>High</sup> and GFP<sup>Low</sup> respectively,  
422 while the non-GFP expressing population were designated as GFP<sup>Null</sup>. Cells were sorted into cell  
423 culture media, recounted, seeded, and allowed to rest for 24 hours before use in experiments.

424 Cell sorting for targeted metabolomics was conducted on GFP-NANOG MDA-MB-231 cells  
425 stained for HA using Alexfluor-568 (ThermoFisher) conjugated HA binding protein (HABP, 40  
426 µg/mL, MilliporeSigma). The high HA (top 5%) or low HA (bottom 5%) fractions were sorted  
427 using a BD FACSAria Fusion Cell Sorter.

428 ALDH activity was determined for MDA-MB-231 and MCF10A cells using the Aldefluor™  
429 Assay (STEMCELL Technologies) according to manufacturer instructions with incubation  
430 conducted for 30min at 37°C. Analysis was conducted on a BD Accuri C6 Plus analyzer.

431 The fraction of CD44<sup>+</sup>/CD24<sup>-</sup> cells was determined by trypsinizing and resuspending cells in  
432 FACS buffer at 10x10<sup>6</sup> cells/mL followed by incubation with antibodies against human CD44  
433 (APC-conjugated, Clone G44-26, 1:5, BD Biosciences) and CD24 (PE-Cy7-conjugated, Clone  
434 ML5, 1:20, BD Biosciences). Gates were determined using the isotype controls mouse anti-IgG2b  
435  $\kappa$  (APC-conjugated, Clone 27-35, 1:5, BD Biosciences) and mouse anti-IgG2a  $\kappa$  (PE-Cy7-  
436 conjugated, Clone G155-178, 1:20, BD Biosciences). Cells were analyzed on a BD Accuri C6 Plus  
437 Analyzer.

438

#### 439 *Invasion and Migration Assays*

440 To prepare microfluidic invasion assays, rat tail Type I collagen (Corning) was neutralized with 1  
441 N NaOH and diluted with 1X DMEM to a final concentration of 2.5 mg/mL. Before neutralization  
442 and dilution, 10x DMEM was added to collagen as a pH indicator to a final concentration of 10%  
443 v/v. Microfluidic 3D cell culture devices (AIM Biotech) were then injected with the 2.5 mg/mL  
444 rat tail Type I collagen solution into the center channel of the chip. The chips were then incubated  
445 at 4°C for 30 minutes, followed by incubation at 37°C for 30 minutes to complete collagen  
446 polymerization. For MDA-MB-231 invasion, DMEM containing 1% FBS and 1%  
447 penicillin/streptomycin was injected into the left flanking media channel, and DMEM containing  
448 10% FBS and 1% penicillin/streptomycin was injected into the right flanking media channel. For  
449 MCF10A invasion, MCF10A media devoid of Horse Serum and EGF was injected into the left  
450 flanking media channel, and fully supplemented MCF10A media was injected into the right  
451 flanking media channel. 10  $\mu$ L of a 2.5x10<sup>5</sup> cell suspension of GFP-NANOG MDA-MB-231 or  
452 MCF10A cells were then injected into both ports of the left channel (20  $\mu$ L total). Cells were  
453 allowed to invade through the hydrogel channel for 3 - 5 days before fixation in a 4%

454 paraformaldehyde solution. Media was exchanged every 24 hours. After fixation, chips were  
455 stained, imaged, and individual cell invasion distance was measured using ImageJ by segmenting  
456 nuclei.

457 To assess random migration ability, GFP-NANOG MDA-MB-231 cells were plated on  
458 fibronectin-coated (30  $\mu\text{g}/\text{mL}$ ) glass 96 well plates and placed in an Incucyte S3 (Sartorius) live  
459 cell imaging system. Images were obtained in 20-minute intervals over 24 hours. Individual cell  
460 tracking was performed using ImageJ to determine migration velocity (motility) and random  
461 migration paths.

462

#### 463 *Immunofluorescence*

464 GFP-NANOG MDA-MB-231 cells were plated on fibronectin-coated (30  $\mu\text{g}/\text{mL}$ ) glass coverslips  
465 at 2500 cells/ $\text{cm}^2$ . Cells were then fixed in 4% paraformaldehyde (PFA)/PBS (w/v) for 20 min at  
466 room temperature, blocked with 1% bovine serum albumin (BSA)/PBS (w/v) for 1 hr at room  
467 temperature, and incubated overnight with AlexaFluor-568 conjugated hyaluronic acid binding  
468 protein (HABP, 13.3  $\mu\text{g}/\text{mL}$ , MilliporeSigma) at 4°C. Afterwards cells were incubated with DAPI  
469 (2.5  $\mu\text{g}/\text{mL}$ , ThermoFisher) for 30 min at room temperature.

470 For invasion experiments, devices were fixed in 4% paraformaldehyde (PFA)/PBS for 30 min at  
471 room temperature, permeabilized with 0.1% Triton X-100/PBS (v/v) for 15 min at room  
472 temperature, blocked with 1% bovine serum albumin (BSA)/PBS (w/v) for 1 hr at room  
473 temperature, and incubated with DAPI (2.5  $\mu\text{g}/\text{mL}$ ) and either AlexaFluor-568 (ThermoFisher) or  
474 AlexaFluor-647 (ThermoFisher) phalloidin to visualize F-actin.

475

#### 476 *Confocal Microscopy and Image Analysis*

477 Images were acquired on a Zeiss LSM 710 confocal microscope with either a LD LCI Plan-  
478 Apochromat 25x/0.8 Imm Korr DIC M27 or C-Apochromat W M27 10x/0.45 objective. Images  
479 were analyzed using ImageJ with custom scripts. Briefly, for single cell intensity measurements,  
480 z-stacks were sum projected and cells were segmented based on HA intensity. Cell clusters were  
481 manually corrected to individual cells, while overlapping or edge-located cells were excluded from  
482 analysis.

483 For invasion experiments, the C-Apochromat W M27 10x/0.45 objective was used at 0.6x zoom,  
484 and a z-stack was obtained along a 2 mm length in the center of the device. Z-stacks were  
485 maximum intensity projected, and invasion was assessed based on nuclei displacement along the  
486 x-axis (across the hydrogel region). Invasion distance was normalized to the appropriate control  
487 in each set of replicates per experiment, and data was pooled together across device replicates to  
488 obtain averages per condition.

489

#### 490 *Metabolic Analysis*

491 To obtain an initial measure of glycolytic ability, sorted GFP-NANOG MDA-MB-231 cells were  
492 seeded in 24 well plates at 10,000 cells/cm<sup>2</sup> in 1 mL of media. Glucose concentration was measured  
493 using a GlucCell Glucose Monitoring System (CESCO Bioengineering), and lactate concentration  
494 was obtained using a colorimetric lactate assay kit (Sigma).

495 Targeted metabolomics was conducted on GFP-NANOG MDA-MB-231 cells 48 hours post  
496 sorting for HA production. Media was collected and non-adherent cells were pelleted at 500 x g  
497 for 4 minutes. Meanwhile, 0.5 mL of 80% methanol (MetOH) was added onto adherent cells and  
498 incubated at -80°C, After aspirating supernatant, the cell pellet was resuspended in 0.5 mL of 80%  
499 MetOH and added to the respective well of adherent cells in plate and incubated at -80°C for 15

500 minutes. Cells were then scraped using a cell scraper and collected into an Eppendorf tube and  
501 pelleted at 20,000 x g for 10 minutes at 4°C. Supernatant was then transferred to 2 mL screw-cap  
502 vial and dried overnight under vacuum at room temperature. Following overnight drying, samples  
503 were then dried for 2.5 hours in SpeedVac SPD 1030 at room temperature and then stored at -80°C  
504 until analyzed by Weill Cornell Medicine Proteomics and Metabolomics Core Facility.

505 Real-time changes in metabolism were tested using a Seahorse XFe96 Analyzer in conjunction  
506 with the Seahorse XF Glycolysis Stress Test Assay Kit and the Seahorse XF Real-time ATP Assay  
507 Rate Kit (Agilent). Manufacturer instructions were followed to perform each of the assays.  
508 Wildtype and modified MDA-MB-231 cells were seeded on a Seahorse XFe96 Cell Culture  
509 microplate at 20,000 cells per well in standard media and allowed to attach overnight. For  
510 experiments with MCF10A, cells were seeded at 20,000 cells per well. HAS overexpressing cells  
511 had media changed 24 hours after seeding to include 1 µg/mL doxycycline. Media was then  
512 changed to the specific Seahorse assay media, and plates were prepared according to manufacturer  
513 instructions for each assay kit. Relevant metabolic values from each assay were calculated using  
514 template worksheets provided by Agilent. After the assays were complete, DNA was extracted  
515 from each well using Caron's Buffer (25 mM Tris-HCl, 0.4 M NaCl, 0.5% (w/v) sodium  
516 dodecylsulfate), and total DNA content measured using the fluorometric Quantifluor dsDNA  
517 Assay (VWR) and converted to cell number for normalization.

518

### 519 *Flux Balance Analysis (FBA)*

520 To generate a computational model of metabolic fluxes in sorted GFP-NANOG MDA-MB-231  
521 cells, cells were sorted as described above and seeded into 24 well plates at 10,000 cells/cm<sup>2</sup>. Cells  
522 were allowed to attach overnight before a fresh media change. Media was collected 72 hours after

523 the initial media change and stored at  $-80^{\circ}\text{C}$  before performing extracellular metabolomics to  
524 measure levels of glucose, lactate, and the 20 amino acids. Glucose was measured using Contour  
525 next EZ Blood Glucose Monitoring System (Ascensia Diabetes Care) using  $5\ \mu\text{L}$  as the sample  
526 volume. Lactate and amino acid concentrations were assayed using an Acquity UPLC H-Class  
527 System equipped with QDa and tunable UV (TUV) detectors controlled by Empower 3 software  
528 (Waters Corporation). Specifically, extracellular amino acids were analyzed using a Waters AccQ-  
529 Tag Ultra Derivatization Kit (Waters) according to the manufacturer's recommendations.  
530 Derivatized samples were injected onto an AccQ-Tag Ultra C18 column ( $1.7\ \mu\text{m}$ ,  $2.1\ \text{mm} \times 100$   
531  $\text{mm}$ , Waters) and detected by an Acquity TUV detector (Waters) at  $260\ \text{nm}$ . Amino acids were  
532 identified by known retention times of standards and concentrations were determined by  
533 comparison with calibration standard curves. For the lactate measurements, samples were first  
534 deproteinized by treatment with an equal volume of trichloroacetic acid followed by centrifugation  
535 at  $12,000 \times g$  for 10 minutes.  $200\ \mu\text{L}$  of the supernatant was then combined with  $600\ \mu\text{L}$  of  
536 acetonitrile (ACN) before injecting  $2\ \mu\text{L}$  into the LC-MS system. Lactate was quantified using a  
537 standard curve ranging from  $0.05\ \text{mM}$  to  $1\ \text{mM}$ . Separations were performed on an Acquity UPLC  
538 BEH Amide Column ( $1.7\ \mu\text{m}$ ,  $2.1\ \text{mm} \times 100\ \text{mm}$ , Waters). Solvent A consisted of 50:50  
539 ACN:Water and solvent B consisted of 95:5 ACN:Water. The solvent gradient started at 0.01%  
540 solvent A and 99.9% solvent B, raised to 40% A in 0.5 minutes, further raised to 70% A in 1.5  
541 minutes, and returned to initial conditions over 0.1 minute and held for 3 minutes to re-equilibrate  
542 the column. The flow rate was set to  $0.6\ \text{mL}/\text{min}$ , the autosampler was set to  $5^{\circ}\text{C}$ , and the column  
543 was set to  $50^{\circ}\text{C}$ . The mass-to-charge ratio ( $m/z$ ) of lactate was 88.9. Analysis was performed in  
544 negative ion mode with a cone voltage of  $15\ \text{V}$  and probe temperature of  $600^{\circ}\text{C}$ .



545 Extracellular metabolomics data of all 20 amino acids, lactate, and glucose was then used to  
546 constrain a flux balance analysis by imposing bounds on allowable fluxes. Growth rate and O<sub>2</sub>  
547 fluxes were constrained from cell counts and Seahorse data respectively. The model used in this  
548 study was implemented in the Julia programming language<sup>66</sup>, where the linear programming  
549 problem was solved using the GNU Linear Programming Kit (GLPK) package  
550 (<https://www.gnu.org/software/glpk/>). The stoichiometric matrix and metabolic growth  
551 requirements were derived from a previously developed Core Cancer model<sup>41</sup>. The objective  
552 function was set to maximize HA production subject to experimentally estimated rates of uptake,  
553 secretion, and cell growth to define the phenotype of interest; 1000 simulations were performed  
554 for each condition. A subset of the FBA results representing the energetic pathways of interest was  
555 incorporated into a graphical representation (Fig. 4). The full FBA results can be found in  
556 Supplementary File 1.

557

#### 558 *Limited Dilution Assay*

559 Cells were serially diluted and seeded into ultra-low attachment 96-well plates (Corning) in 200  
560  $\mu$ L of serum-free DMEM/F-12 containing 2% B27, 10 ng/mL basic fibroblast growth factor, 20  
561 ng/mL epidermal growth factor, 10  $\mu$ g/mL insulin, and 1  $\mu$ g/mL doxycycline. Sphere formation  
562 was assessed after two weeks of culture, and the number of spheres was counted using a phase-  
563 contrast microscope. The stem cell frequency was determined using the extreme limited dilution  
564 algorithm<sup>67</sup>.

565

#### 566 *RNA-Sequencing*

567 Parental (NeoR-rtTA) and HA overproducing MCF10A cells were seeded on 10-cm dishes at 5000  
568 cells/cm<sup>2</sup> and allowed to adhere overnight. Media was refreshed to include 1 µg/mL of doxycycline  
569 to induce HAS2 and HAS3 expression and cultured for an additional 48 hours. RNA was isolated  
570 using the Qiagen RNeasy kit according to manufacturer instructions. RNA libraries were prepared  
571 using the Illumina TruSeq RNA Kit, and single-ended 75bp read lengths were sequenced on the  
572 Illumina NextSeq 500 system.

573

#### 574 *Sequence Alignment and Gene Set Enrichment Analysis*

575 Reads were trimmed using TrimGalore version 0.4.4  
576 ([https://www.bioinformatics.babraham.ac.uk/projects/trim\\_galore/](https://www.bioinformatics.babraham.ac.uk/projects/trim_galore/)) and aligned to the human  
577 reference genome GRCh38 (ENSEMBL) using STAR version 2.6.0a<sup>68</sup>. Reads of genomic features  
578 were counted using featureCounts<sup>69</sup>, and differential gene expression was determined using  
579 DESeq2<sup>70</sup>. Differentially expressed genes in HA overproducing cells were defined as a log-2 fold  
580 change greater than 1 and an adjusted p-value less than 0.0001 compared to the parental cells.  
581 Genes common to both HAS2 and HAS3 were combined to generate the HA overproducing gene  
582 signature for survival analysis. Individual HAS2 and HAS3 gene signatures were defined as the  
583 differentially expressed genes with log 2-fold change greater than 2 or 5, respectively, and a p-  
584 value less than 0.0001.

585 Gene set enrichment analysis (GSEA) was conducted with a ranked list generated by taking the  
586 sign of the fold change multiplied by the log-10 of the adjusted p-value. The list was inputted to  
587 the GSEA Java applet (<http://software.broadinstitute.org/gsea/index.jsp>) using the  
588 GSEAPreRanked tool and the Hallmarks gene sets from MSigDB v.7.0. Gene sets were considered  
589 significantly enriched with a p-value and FDR value  $\leq 0.05$ .

590

591 *Patient Survival and Enrichment Analysis*

592 Patient data from the METABRIC cohort was extracted from the Cancer Genomics Data Server.  
593 Patients were limited to those having not received chemotherapy. Gene signature scores were  
594 calculated using the single-sample GSEA (ssGSEA)<sup>71</sup> with the GSVA package<sup>72</sup>. The top and  
595 bottom quartiles of the ssGSEA scores for the 72-gene HA overproduction signature were  
596 designated as high and low scores, respectively, for survival and enrichment analysis. Kaplan-  
597 Meier survival analysis was conducted with the *survival* package in R using a Cox proportional  
598 hazard model with statistical significance determined using a log-rank test. Stratified patients were  
599 further analyzed for enrichment of curated lists of migration, cytoskeletal, and metabolic gene  
600 signatures obtained from the MSigDB v7.0. To correct for random associations, 300 randomly  
601 selected gene signatures with the same number of genes (15-500 genes) as gene sets in the curated  
602 list had ssGSEA enrichment scores additionally calculated. An empirical cumulative distribution  
603 function was established using the *ecdf* function in R and a p-value cutoff was determined where  
604 95% of values fell below.

605

606 *Statistical analysis*

607 All experiments were performed with at least three independent biological replicates unless  
608 otherwise noted. Pairwise comparisons were conducted using a Mann-Whitney U test unless  
609 otherwise noted. Multiple comparisons were evaluated with either a Kruskal-Wallis Test or two-  
610 way ANOVA with Dunn's post hoc analysis. Results were considered statistically significant with  
611 a p-value less than 0.05. Unless otherwise noted, all data points are plotted mean +/- the standard  
612 deviation. All statistically analysis was performed using GraphPad Prism v9.3 or R.

613

614

615 **References**

- 616 1. Siegel, R. L., Miller, K. D. & Jemal, A. Cancer statistics, 2020. *CA. Cancer J. Clin.* **70**, 7–  
617 30 (2020).
- 618 2. Hinohara, K. & Polyak, K. Intratumoral Heterogeneity: More Than Just Mutations. *Trends*  
619 *Cell Biol.* **29**, 569–579 (2019).
- 620 3. Turajlic, S. & Swanton, C. Metastasis as an evolutionary process. *Science (80-. ).* **352**,  
621 169–175 (2016).
- 622 4. Battle, E. & Clevers, H. Cancer stem cells revisited. *Nat. Med.* **23**, 1124–1134 (2017).
- 623 5. Pattabiraman, D. R. & Weinberg, R. A. Tackling the cancer stem cells — what challenges  
624 do they pose? *Nat. Rev. Drug Discov.* *2014 137* **13**, 497–512 (2014).
- 625 6. Wang, M. L., Chiou, S. H. & Wu, C. W. Targeting cancer stem cells: emerging role of  
626 Nanog transcription factor. *Onco. Targets. Ther.* **6**, 1207 (2013).
- 627 7. Ray, A., Slama, Z. M., Morford, R. K., Madden, S. A. & Provenzano, P. P. Enhanced  
628 Directional Migration of Cancer Stem Cells in 3D Aligned Collagen Matrices. *Biophys. J.*  
629 **112**, 1023–1036 (2017).
- 630 8. Pang, M.-F. *et al.* Tissue Stiffness and Hypoxia Modulate the Integrin-Linked Kinase ILK  
631 to Control Breast Cancer Stem-like Cells. *Cancer Res.* **76**, 5277–5287 (2016).
- 632 9. Conklin, M. W. *et al.* Aligned Collagen Is a Prognostic Signature for Survival in Human  
633 Breast Carcinoma. *Am. J. Pathol.* **178**, 1221–1232 (2011).
- 634 10. Provenzano, P. P. *et al.* Collagen reorganization at the tumor-stromal interface facilitates  
635 local invasion. *BMC Med.* **4**, 38 (2006).
- 636 11. Auvinen, P. *et al.* Hyaluronan in Peritumoral Stroma and Malignant Cells Associates with  
637 Breast Cancer Spreading and Predicts Survival. *Am. J. Pathol.* **156**, 529–536 (2000).
- 638 12. Marusyk, A. *et al.* Spatial Proximity to Fibroblasts Impacts Molecular Features and  
639 Therapeutic Sensitivity of Breast Cancer Cells Influencing Clinical Outcomes. *Cancer*  
640 *Res.* **76**, 6495–6506 (2016).
- 641 13. Jacobetz, M. A. *et al.* Hyaluronan impairs vascular function and drug delivery in a mouse  
642 model of pancreatic cancer. *Gut* **62**, 112–120 (2013).
- 643 14. Hartheimer, J. S., Park, S., Rao, S. S. & Kim, Y. Targeting Hyaluronan Interactions for  
644 Glioblastoma Stem Cell Therapy. *Cancer Microenviron.* **12**, 47–56 (2019).

- 645 15. Chanmee, T. *et al.* Excessive Hyaluronan Production Promotes Acquisition of Cancer  
646 Stem Cell Signatures through the Coordinated Regulation of Twist and the Transforming  
647 Growth Factor  $\beta$  (TGF- $\beta$ )-Snail Signaling Axis. *J. Biol. Chem.* **289**, 26038–26056 (2014).
- 648 16. Auvinen, P. *et al.* Hyaluronan synthases (HAS1–3) in stromal and malignant cells  
649 correlate with breast cancer grade and predict patient survival. *Breast Cancer Res. Treat.*  
650 **143**, 277–286 (2014).
- 651 17. Chanmee, T. *et al.* Hyaluronan Production Regulates Metabolic and Cancer Stem-like  
652 Properties of Breast Cancer Cells via Hexosamine Biosynthetic Pathway-coupled HIF-1  
653 Signaling. *J. Biol. Chem.* **291**, 24105–24120 (2016).
- 654 18. Kuo, J. C.-H., Gandhi, J. G., Zia, R. N. & Paszek, M. J. Physical biology of the cancer cell  
655 glycolyx. *Nat. Phys.* **14**, 658–669 (2018).
- 656 19. Turley, E. A., Wood, D. K. & McCarthy, J. B. Carcinoma Cell Hyaluronan as a “Portable”  
657 Cancerized Prometastatic Microenvironment. *Cancer Res.* **76**, 2507–2512 (2016).
- 658 20. Brett, M.-E. *et al.* In vitro elucidation of the role of pericellular matrix in metastatic  
659 extravasation and invasion of breast carcinoma cells. *Integr. Biol.* **10**, 242–252 (2018).
- 660 21. Offeddu, G. S. *et al.* The cancer glycolyx mediates intravascular adhesion and  
661 extravasation during metastatic dissemination. *Commun. Biol.* **4**, 255 (2021).
- 662 22. Diehn, M. *et al.* Association of reactive oxygen species levels and radioresistance in  
663 cancer stem cells. *Nature* **458**, 780–783 (2009).
- 664 23. Luo, M. *et al.* Targeting Breast Cancer Stem Cell State Equilibrium through Modulation  
665 of Redox Signaling. *Cell Metab.* **28**, 69–86.e6 (2018).
- 666 24. Peiris-Pagès, M., Martinez-Outschoorn, U. E., Pestell, R. G., Sotgia, F. & Lisanti, M. P.  
667 Cancer stem cell metabolism. *Breast Cancer Res.* **18**, 55 (2016).
- 668 25. Zanutelli, M. R. *et al.* Regulation of ATP utilization during metastatic cell migration by  
669 collagen architecture. *Mol. Biol. Cell* **29**, 1–9 (2018).
- 670 26. Cunniff, B., McKenzie, A. J., Heintz, N. H. & Howe, A. K. AMPK activity regulates  
671 trafficking of Mitochondria to the leading edge during cell migration and matrix invasion.  
672 *Mol. Biol. Cell* **27**, 2662–2674 (2016).
- 673 27. Thiagarajan, P. S. *et al.* Development of a Fluorescent Reporter System to Delineate  
674 Cancer Stem Cells in Triple-Negative Breast Cancer. *Stem Cells* **33**, 2114–2125 (2015).
- 675 28. Romani, P., Valcarcel-Jimenez, L., Frezza, C. & Dupont, S. Crosstalk between  
676 mechanotransduction and metabolism. *Nat. Rev. Mol. Cell Biol.* **22**, 22–38 (2021).
- 677 29. Ginestier, C. *et al.* ALDH1 Is a Marker of Normal and Malignant Human Mammary Stem  
678 Cells and a Predictor of Poor Clinical Outcome. *Cell Stem Cell* **1**, 555–567 (2007).

- 679 30. Vincent, K. M., Findlay, S. D. & Postovit, L. M. Assessing breast cancer cell lines as  
680 tumour models by comparison of mRNA expression profiles. *Breast Cancer Res.* **17**, 114  
681 (2015).
- 682 31. Chokchaitaweek, C., Kobayashi, T., Izumikawa, T. & Itano, N. Enhanced hexosamine  
683 metabolism drives metabolic and signaling networks involving hyaluronan production and  
684 O-GlcNAcylation to exacerbate breast cancer. *Cell Death Dis.* **10**, 803 (2019).
- 685 32. Rilla, K. *et al.* Hyaluronan Synthase 1 (HAS1) Requires Higher Cellular UDP-GlcNAc  
686 Concentration than HAS2 and HAS3. *J. Biol. Chem.* **288**, 5973–5983 (2013).
- 687 33. Rilla, K. *et al.* Hyaluronan production enhances shedding of plasma membrane-derived  
688 microvesicles. *Exp. Cell Res.* **319**, 2006–2018 (2013).
- 689 34. Itano, N. *et al.* Three Isoforms of Mammalian Hyaluronan Synthases Have Distinct  
690 Enzymatic Properties. *J. Biol. Chem.* **274**, 25085–25092 (1999).
- 691 35. Al-Hajj, M., Wicha, M. S., Benito-Hernandez, A., Morrison, S. J. & Clarke, M. F.  
692 Prospective identification of tumorigenic breast cancer cells. *Proc. Natl. Acad. Sci.* **100**,  
693 3983–3988 (2003).
- 694 36. Liu, S. *et al.* Breast Cancer Stem Cells Transition between Epithelial and Mesenchymal  
695 States Reflective of their Normal Counterparts. *Stem Cell Reports* **2**, 78–91 (2014).
- 696 37. Li, W. *et al.* Unraveling the roles of CD44/CD24 and ALDH1 as cancer stem cell markers  
697 in tumorigenesis and metastasis. *Sci. Rep.* **7**, 13856 (2017).
- 698 38. Sheridan, C. *et al.* CD44<sup>+</sup>/CD24<sup>-</sup> breast cancer cells exhibit enhanced invasive properties:  
699 an early step necessary for metastasis. *Breast Cancer Res.* **8**, R59 (2006).
- 700 39. Orth, J. D., Thiele, I. & Palsson, B. Ø. What is flux balance analysis? *Nat. Biotechnol.* **28**,  
701 245–248 (2010).
- 702 40. Asgari, Y., Zabihinpour, Z., Salehzadeh-Yazdi, A., Schreiber, F. & Masoudi-Nejad, A.  
703 Alterations in cancer cell metabolism: The Warburg effect and metabolic adaptation.  
704 *Genomics* **105**, 275–281 (2015).
- 705 41. Zielinski, D. C. *et al.* Systems biology analysis of drivers underlying hallmarks of cancer  
706 cell metabolism. *Sci. Reports 2017 71* **7**, 1–14 (2017).
- 707 42. Korkaya, H., Liu, S. & Wicha, M. S. Breast cancer stem cells, cytokine networks, and the  
708 tumor microenvironment. *J. Clin. Invest.* **121**, 3804–3809 (2011).
- 709 43. Yoon, C. *et al.* PI3K/Akt pathway and Nanog maintain cancer stem cells in sarcomas.  
710 *Oncogenesis* **10**, 12 (2021).
- 711 44. Liberzon, A. *et al.* The Molecular Signatures Database Hallmark Gene Set Collection.  
712 *Cell Syst.* **1**, 417–425 (2015).

- 713 45. Miroshnikova, Y. A. *et al.* Tissue mechanics promote IDH1-dependent HIF1 $\alpha$ –tenascin C  
714 feedback to regulate glioblastoma aggression. *Nat. Cell Biol.* **18**, 1336–1345 (2016).
- 715 46. Schaefer, C. F. *et al.* PID: the Pathway Interaction Database. *Nucleic Acids Res.* **37**,  
716 D674–D679 (2009).
- 717 47. Semenza, G. L. Hypoxia-inducible factor 1: oxygen homeostasis and disease  
718 pathophysiology. *Trends Mol. Med.* **7**, 345–350 (2001).
- 719 48. Slemc, L. & Kunej, T. Transcription factor HIF1A: downstream targets, associated  
720 pathways, polymorphic hypoxia response element (HRE) sites, and initiative for  
721 standardization of reporting in scientific literature. *Tumor Biol.* **37**, 14851–14861 (2016).
- 722 49. Hackett, S. R. *et al.* Systems-level analysis of mechanisms regulating yeast metabolic  
723 flux. *Science (80-. )*. **354**, aaf2786–aaf2786 (2016).
- 724 50. Hu, H. *et al.* Phosphoinositide 3-Kinase Regulates Glycolysis through Mobilization of  
725 Aldolase from the Actin Cytoskeleton. *Cell* **164**, 433–446 (2016).
- 726 51. Barbie, D. A. *et al.* Systematic RNA interference reveals that oncogenic KRAS-driven  
727 cancers require TBK1. *Nature* **462**, 108–112 (2009).
- 728 52. Shurer, C. R. *et al.* Physical Principles of Membrane Shape Regulation by the Glycocalyx.  
729 *Cell* **177**, 1757-1770.e21 (2019).
- 730 53. Bergert, M. *et al.* Force transmission during adhesion-independent migration. *Nat. Cell*  
731 *Biol.* **17**, 524–529 (2015).
- 732 54. Paszek, M. J. *et al.* The cancer glycocalyx mechanically primes integrin-mediated growth  
733 and survival. *Nature* **511**, 319–325 (2014).
- 734 55. Barnes, J. M. *et al.* A tension-mediated glycocalyx–integrin feedback loop promotes  
735 mesenchymal-like glioblastoma. *Nat. Cell Biol.* **20**, 1203–1214 (2018).
- 736 56. Sullivan, W. J. *et al.* Extracellular Matrix Remodeling Regulates Glucose Metabolism  
737 through TXNIP Destabilization. *Cell* **175**, 117-132.e21 (2018).
- 738 57. Lewis, N. E. & Abdel-Haleem, A. M. The evolution of genome-scale models of cancer  
739 metabolism. *Front. Physiol.* **4**, 1–7 (2013).
- 740 58. Simmen, F. A., Alhallak, I. & Simmen, R. C. M. Malic enzyme 1 (ME1) in the biology of  
741 cancer: it is not just intermediary metabolism. *J. Mol. Endocrinol.* **65**, R77–R90 (2020).
- 742 59. Jiang, P., Du, W., Mancuso, A., Wellen, K. E. & Yang, X. Reciprocal regulation of p53  
743 and malic enzymes modulates metabolism and senescence. *Nature* **493**, 689–693 (2013).
- 744 60. Cheng, C.-P. *et al.* The mechanisms of malic enzyme 2 in the tumorigenesis of human  
745 gliomas. *Oncotarget* **7**, 41460–41472 (2016).

- 746 61. Dong, C. *et al.* Loss of FBP1 by Snail-Mediated Repression Provides Metabolic  
747 Advantages in Basal-like Breast Cancer. *Cancer Cell* **23**, 316–331 (2013).
- 748 62. Ciavardelli, D. *et al.* Breast cancer stem cells rely on fermentative glycolysis and are  
749 sensitive to 2-deoxyglucose treatment. *Cell Death Dis.* 2014 **5**, e1336–e1336 (2014).
- 750 63. Liberti, M. V. *et al.* A Predictive Model for Selective Targeting of the Warburg Effect  
751 through GAPDH Inhibition with a Natural Product. *Cell Metab.* **26**, 648–659.e8 (2017).
- 752 64. Tanner, L. B. *et al.* Four Key Steps Control Glycolytic Flux in Mammalian Cells. *Cell*  
753 *Syst.* **7**, 49–62.e8 (2018).
- 754 65. Park, J. S. *et al.* Mechanical regulation of glycolysis via cytoskeleton architecture. *Nature*  
755 **578**, 621–626 (2020).
- 756 66. Bezanson, J., Edelman, A., Karpinski, S. & Shah, V. B. Julia: A Fresh Approach to  
757 Numerical Computing. *SIAM Rev.* **59**, 65–98 (2017).
- 758 67. Hu, Y. & Smyth, G. K. ELDA: Extreme limiting dilution analysis for comparing depleted  
759 and enriched populations in stem cell and other assays. *J. Immunol. Methods* **347**, 70–78  
760 (2009).
- 761 68. Dobin, A. *et al.* STAR: ultrafast universal RNA-seq aligner. *Bioinformatics* **29**, 15–21  
762 (2013).
- 763 69. Liao, Y., Smyth, G. K. & Shi, W. featureCounts: an efficient general purpose program for  
764 assigning sequence reads to genomic features. *Bioinformatics* **30**, 923–930 (2014).
- 765 70. Love, M. I., Huber, W. & Anders, S. Moderated estimation of fold change and dispersion  
766 for RNA-seq data with DESeq2. *Genome Biol.* **15**, 550 (2014).
- 767 71. Barbie, D. A. *et al.* Systematic RNA interference reveals that oncogenic KRAS-driven  
768 cancers require TBK1. *Nature* **462**, 108–112 (2009).
- 769 72. Hänzelmann, S., Castelo, R. & Guinney, J. GSEA: gene set variation analysis for  
770 microarray and RNA-Seq data. *BMC Bioinformatics* **14**, 7 (2013).

771  
772



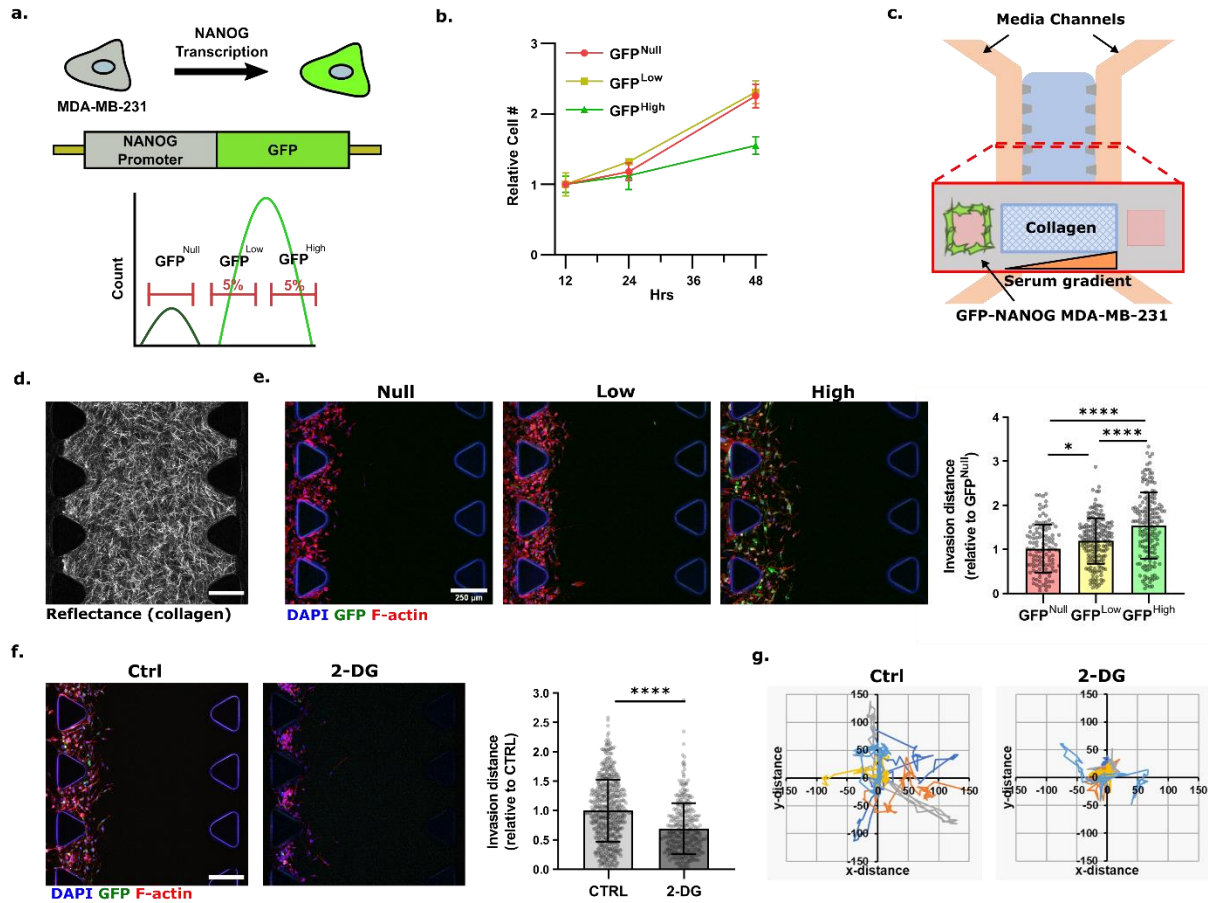

773  
774

**Figure 1: CSCs have increased invasive potential that is sensitive to metabolic challenge. a)** Schematic of the cancer stem cell reporter line GFP-NANOG MDA-MB-231 and sorting strategy. **b)** Growth curve of sorted cells as measured by DNA amount, normalized to the first measurement at t = 12 hrs (n = 3 samples). **c)** Schematic of the microfluidic device to analyze cell invasion in response to a morphogen gradient generated by applying serum-containing medium to the right channel only. **d)** Representative confocal reflectance microscopy image of a fibrillar collagen hydrogel in microfluidic invasion device. **e)** Invasion distance of sorted GFP-NANOG MDA-MB-231 into collagen type I over 5 days (n = 4 fields of views, 1 device per condition). **f)** Invasion of GFP-NANOG MDA-MB-231 cells into collagen type I treated with or without 2-DG for 5 days (n = 3 devices per condition). **g)** Random migration of GFP-NANOG MDA-MB-231 treated with or without 2-DG for 24 hours (n = 5 representative cells for migration plots, n = 20 cells per condition for motility). Scale bar = 250  $\mu$ m. \* p < 0.05, \*\* p < 0.01, \*\*\* p < 0.001, \*\*\*\* p < 0.0001

775  
776  
777  
778  
779  
780  
781  
782  
783  
784  
785  
786  
787  
788

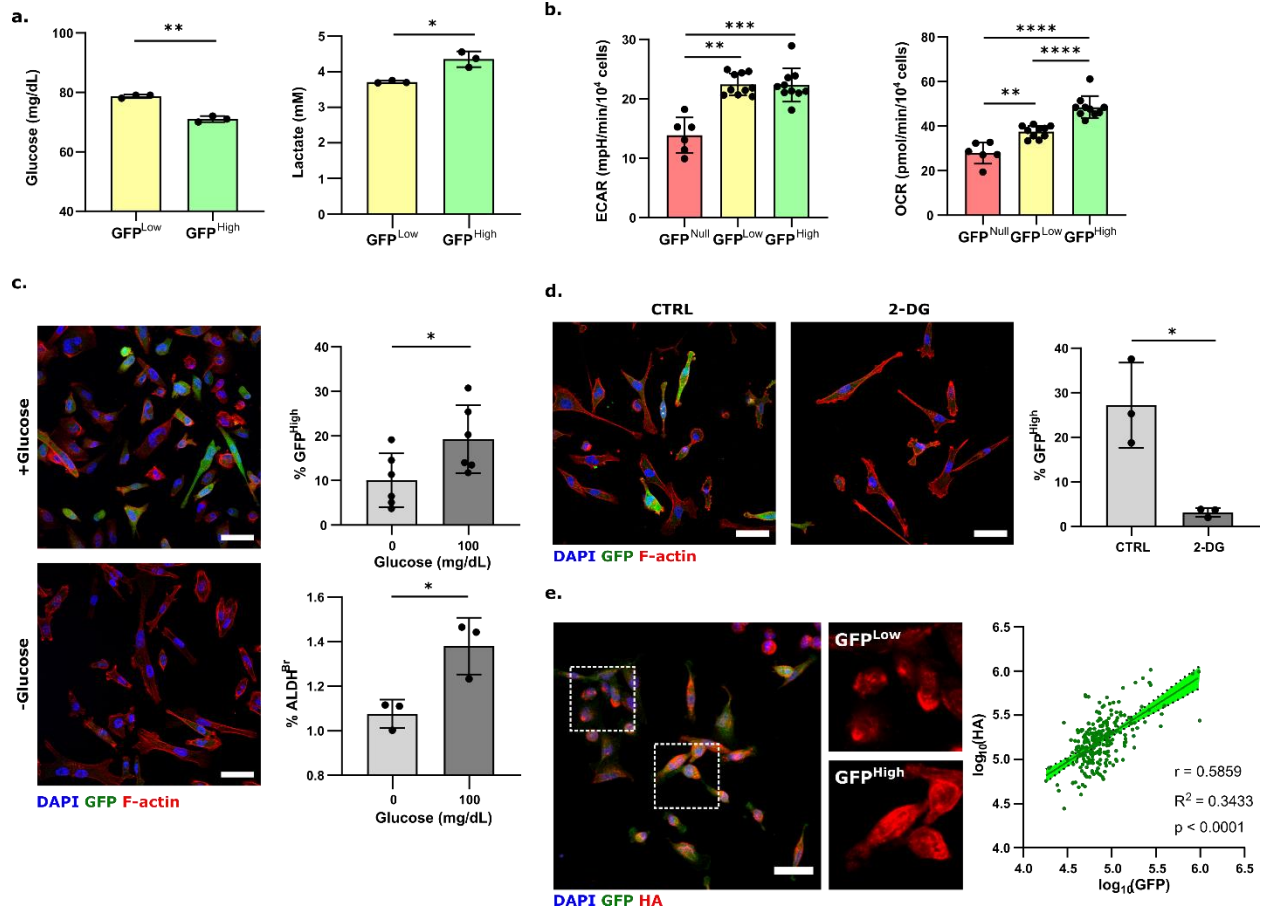

789  
790  
791  
792  
793  
794  
795  
796  
797  
798  
799  
800  
801  
802  
803  
804  
805

**Figure 2: Cancer stem-like cells exhibit altered metabolism compared to non-stem-like cancer cells.** **a)** Glucose and lactate concentrations in media conditioned by sorted GFP-NANOG MDA-MB-231 cells 48 hrs post sort as measured by a GlucCell glucose meter and a lactate colorimetric assay (n = 3 samples). **b)** ECAR and OCR measurements of sorted GFP-NANOG cells obtained during Seahorse-based glycolysis stress test (n > 6 samples). **c)** Fraction of GFP positive (GFP<sup>+</sup>) GFP-NANOG MDA-MB-231 (n = 6) (i) and aldehyde dehydrogenase high (ALDH<sup>+</sup>) (n = 3) (ii) parental MDA-MB-231 when cultured with 100 mg/dL glucose (+glucose) or glucose-free media (-glucose) for 72 hours. GFP<sup>+</sup> and ALDH<sup>+</sup> cells were determined by image analysis and Aldefluor assay, respectively. **d)** Fraction of GFP<sup>+</sup> GFP-NANOG MDA-MB-231 cells treated with or without 2-deoxyglucose (2-DG) (n = 3). **e)** Immunofluorescence analysis of HA in the MDA-MB-231 NANOG reporter line. (n = 248 cells) Scale bar = 50  $\mu$ m. \* p < 0.05, \*\* p < 0.01, \*\*\* p < 0.001, \*\*\*\* p < 0.0001.

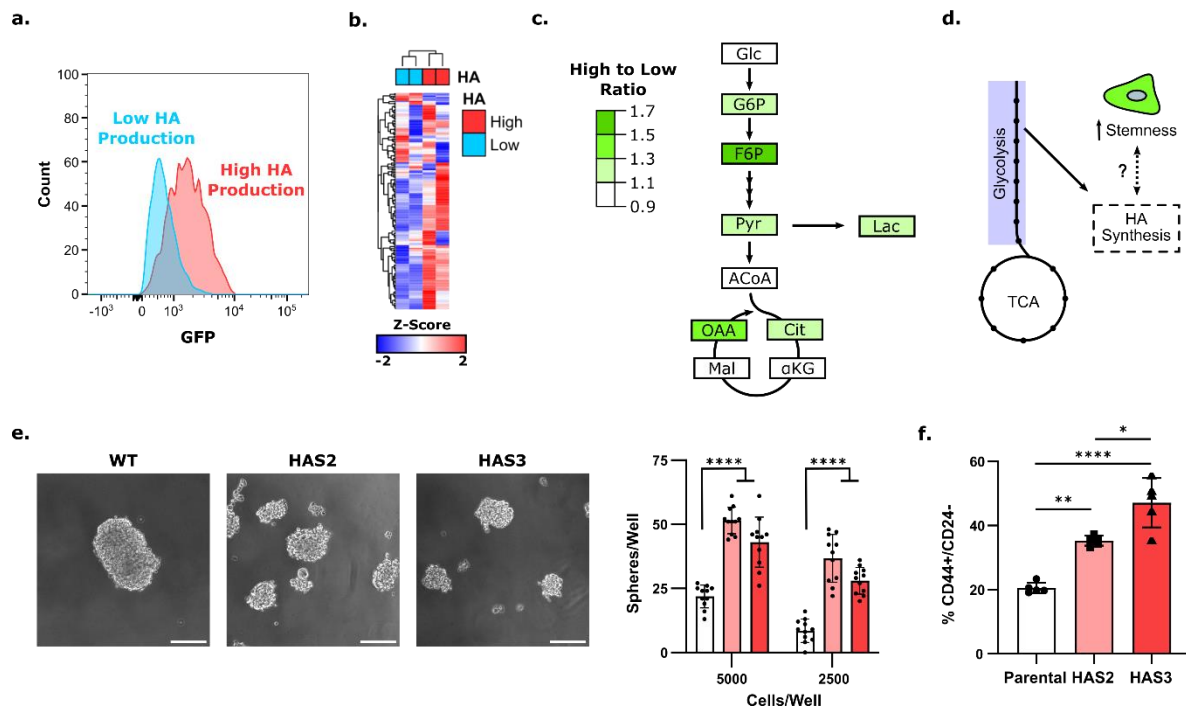

806  
807  
808  
809  
810  
811  
812  
813  
814  
815  
816  
817  
818  
819

**Figure 3: Increased HA production correlates with an increase in CSCs.** **a)** Flow cytometry analysis of cellular GFP levels categorized by their levels of cell surface-associated HA. **b)** Heatmap representing changes of intracellular metabolites as measured by metabolomics of sorted HA<sup>High</sup> and HA<sup>Low</sup> GFP-NANOG MDA-MB-231. **c)** Graphical representation of selected metabolites in the central carbon metabolic pathway ratios between HA<sup>High</sup> and HA<sup>Low</sup> cells. **d)** Schematic representing the theorized relationship between glycolysis, HA synthesis, and stemness. **e)** Representative images of spheres formed through a limiting dilution assay of HAS2 and HAS3 overexpressing MDA-MB-231 and the corresponding sphere number. (n = 11) **f)** Flow cytometry analysis of the percentage of the CD44<sup>+</sup>/CD24<sup>-</sup> population of parental or HA overproducing MCF10A cells (n = 5). \* p<0.05, \*\* p< 0.01, \*\*\*\* p<0.001. Scale bar = 200  $\mu$ m.

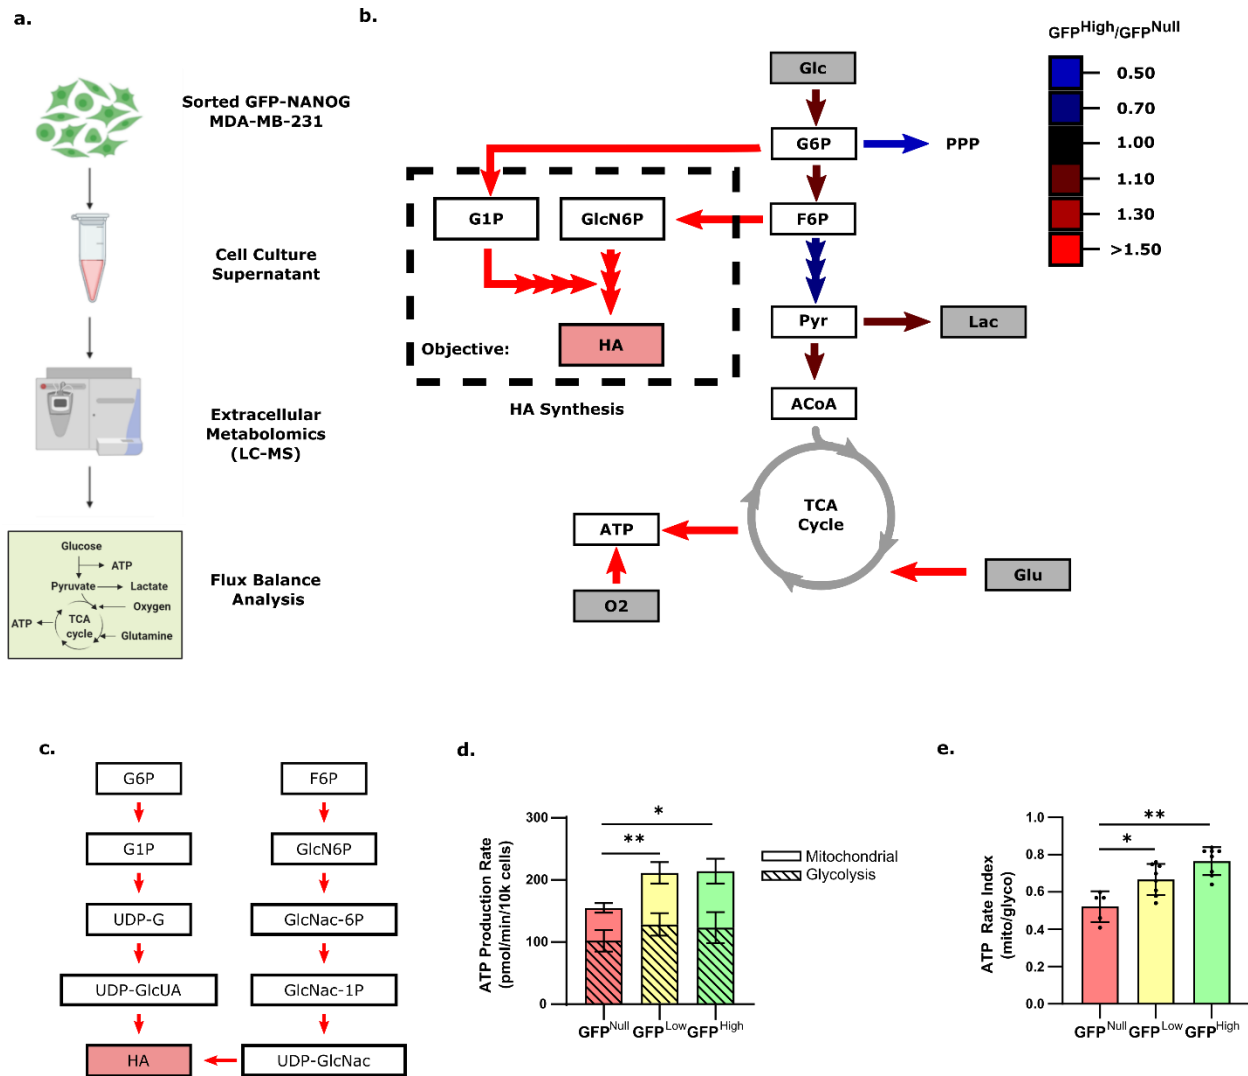

820  
821  
822  
823  
824  
825  
826  
827  
828  
829  
830  
831  
832  
833  
834  
835

**Figure 4: Flux balance analysis predicts increased HA production in cancer stem-like cells and ATP production.** **a)** Workflow schematic. Sorted GFP-NANOG cells were cultured for 72 hrs before performing extracellular metabolomics using LC-MS. This data was used to constrain a computational flux balance analysis model. **b)** Flux balance analysis model of the bioenergetic pathway of sorted GFP-NANOG MDA-MB-231 derived from extracellular metabolomics obtained over 72 hours of culture. Fluxes shown are GFP<sup>High</sup> relative to GFP<sup>Null</sup>. Grey metabolites indicate relevant metabolite fluxes constrained based on extracellular metabolomic profiles. Oxygen was constrained using values obtained from the Agilent Seahorse assay. For the total FBA model constraints and results, see Supplementary File 1. **c)** Expanded HA synthesis pathway flux balance analysis of GFP<sup>High</sup> relative to GFP<sup>Null</sup> (dashed box in B). Same legend as in B. **d)** ATP production rate and **e)** rate index derived from measurements using the Agilent Seahorse ATP real-time production rate assay kit (n ≥ 5). \* p<0.05, \*\* p< 0.01.

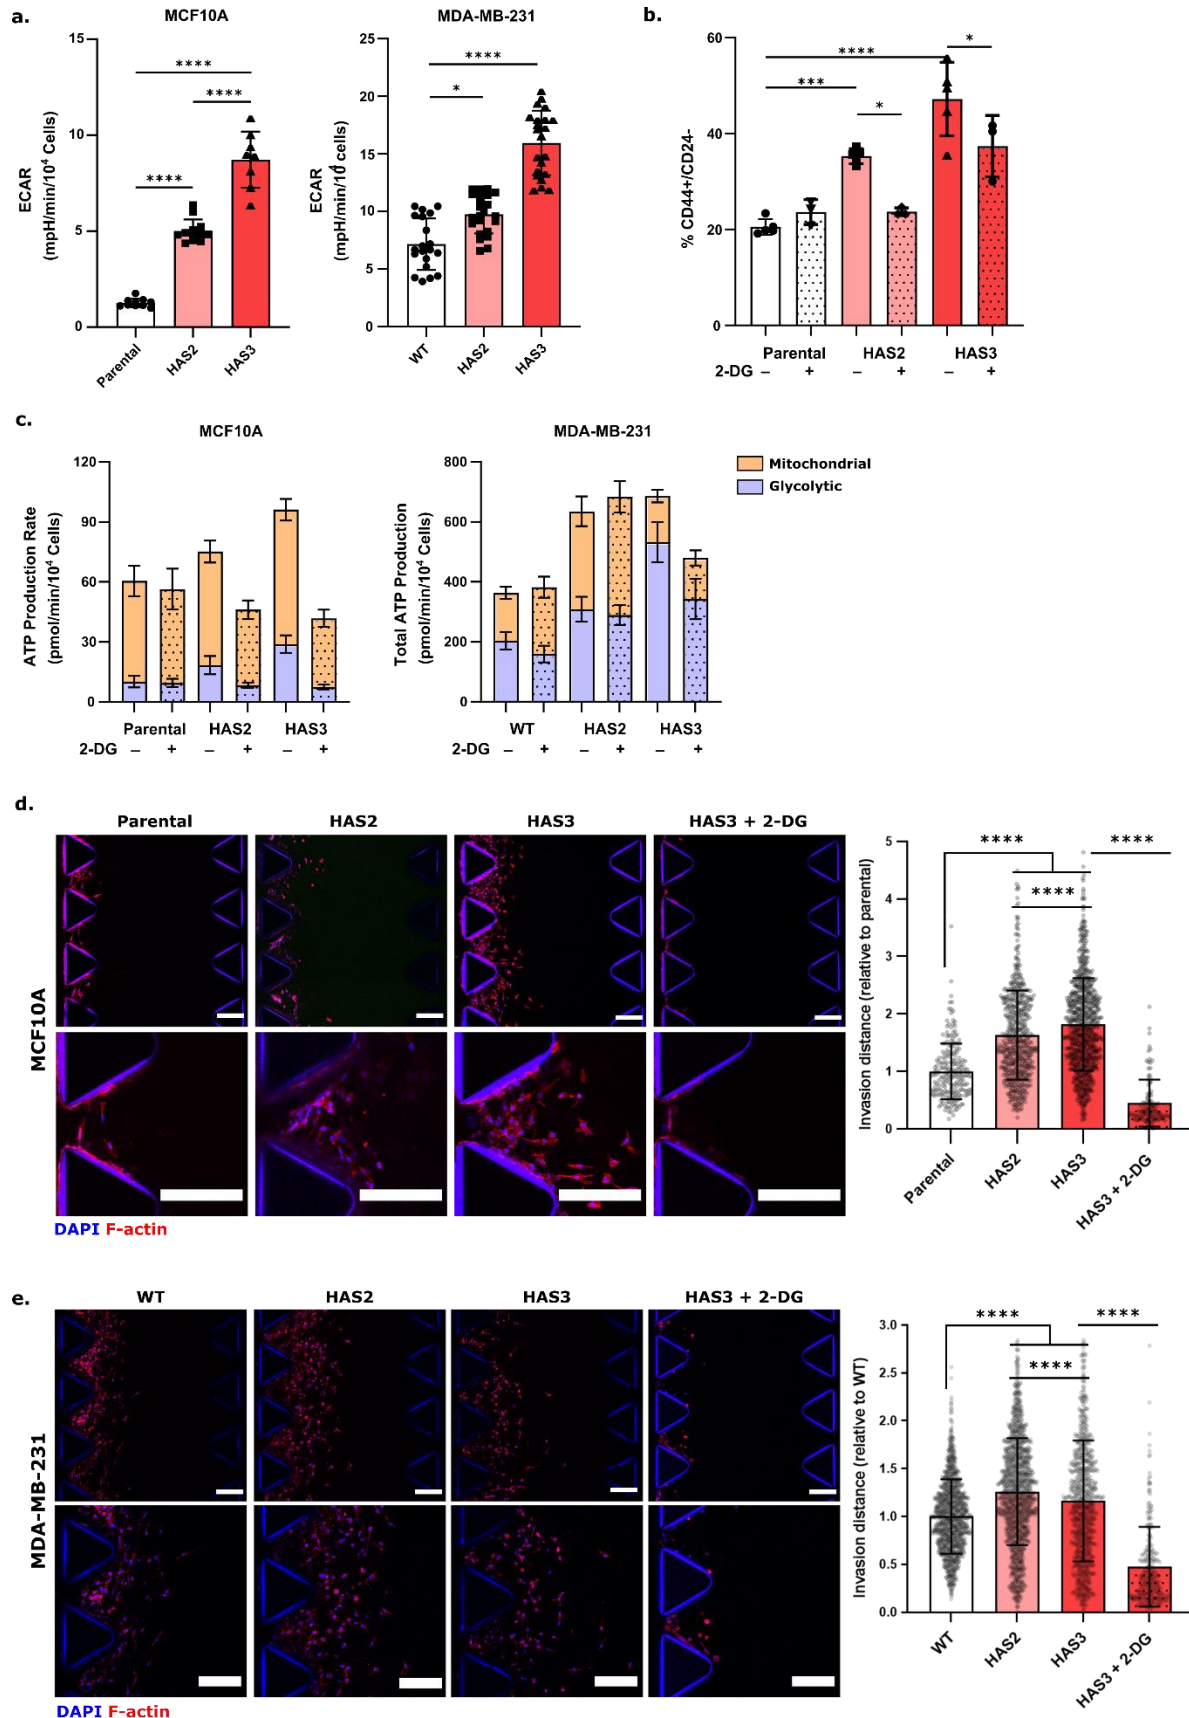

837 **Figure 5: Increased glycolytic metabolism necessary for HA production stimulates**  
838 **stemness and invasion of breast cancer cells. a)** Extracellular acidification rate measurements  
839 of parental MCF10A or HA overproducing cells using the Agilent Seahorse XF Analyzer. **b)**  
840 Percentage of CD44<sup>+</sup>/CD24<sup>-</sup> cells of parental MCF10A or HA overproducing cells with or  
841 without 20mM 2-DG as measured by flow cytometry. **c)** ATP production rate of either MCF10A  
842 or MDA-MB-231 cells overexpressing HAS2 or HAS3 pre-treated with or without 2-DG (20mM  
843 for MCF10A, 25mM for MDA-MB-231) as measured using the Real-Time ATP Rate Assay in  
844 the Agilent Seahorse XF Analyzer. (n ≥ 8) **d)** Invasion of the MCF10A and **e)** MDA-MB-231  
845 HA overproducing cells. Representative immunofluorescence images and corresponding  
846 quantification of invasion after 5 days are shown (n = 3 devices per condition). Scale bar: 200  
847 μm, \* p< 0.05, \*\* p<0.01, \*\*\* p<0.001, \*\*\*\* p<0.0001

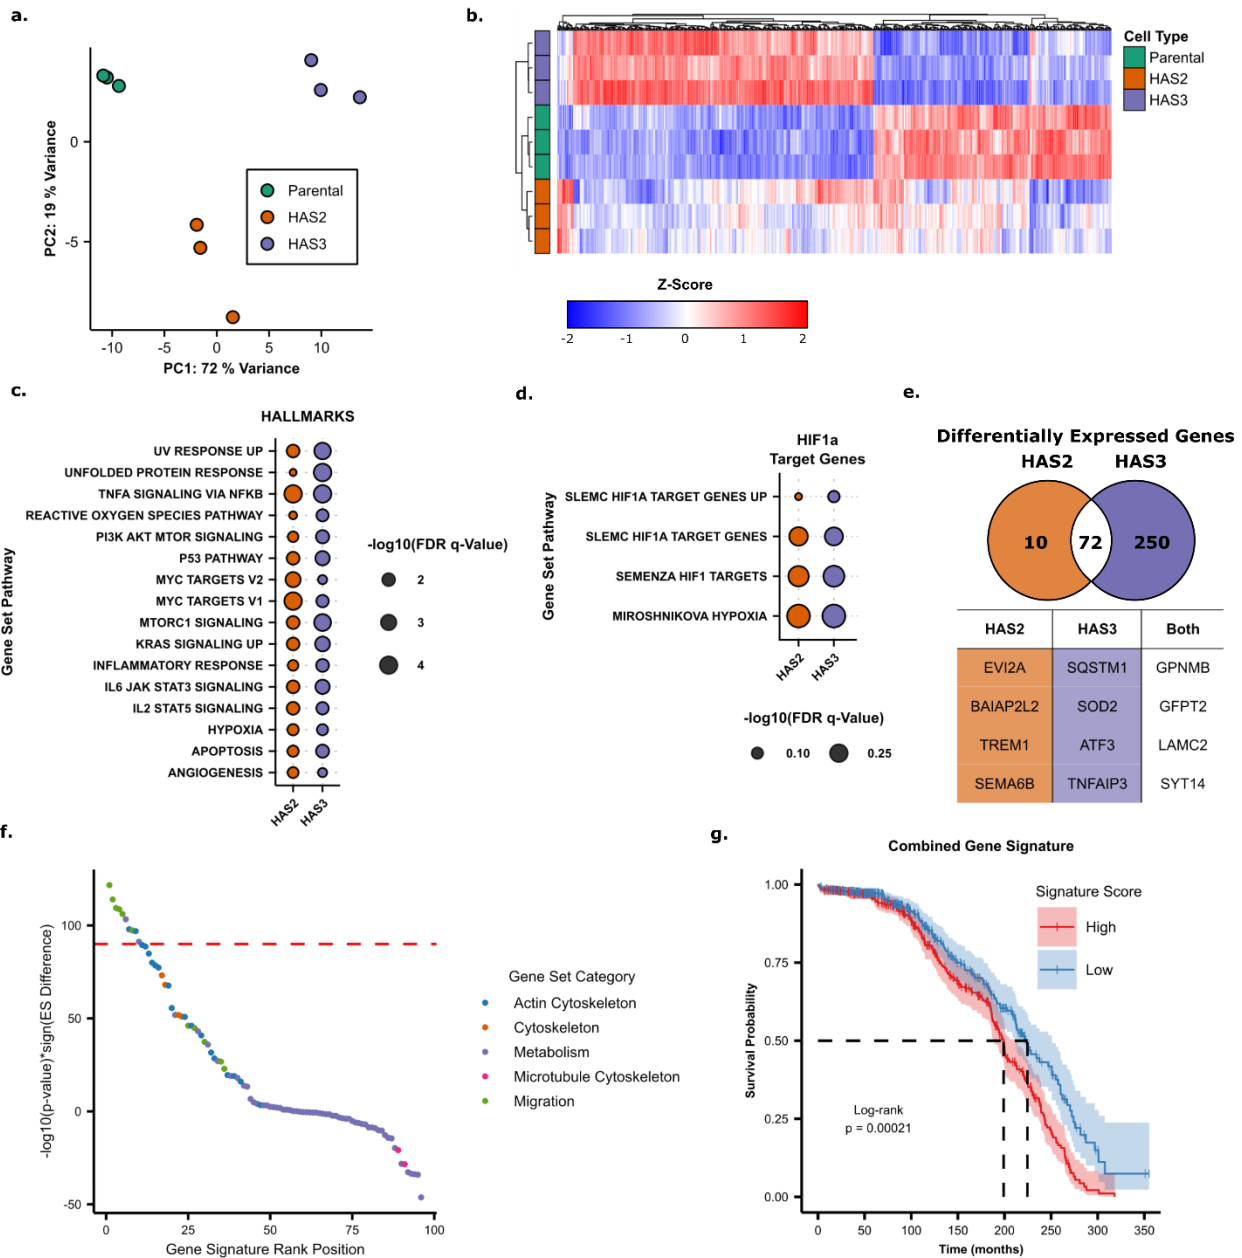

848  
849

850 **Figure 6: Gene signatures of HA overproducing cells correlate with worse patient**  
 851 **prognosis regardless of HAS isoform.** **a)** Principle Component Analysis plot of RNA  
 852 sequencing results of the MCF10A or HA overproducing cells. **b)** Heatmap of z-score  
 853 normalized gene expression of differentially expressed genes with hierarchical clustering of both  
 854 samples and genes. **c)** Gene Set Enrichment Analysis of the Hallmarks gene signature database  
 855 for genes upregulated in either HAS2 or HAS3 overexpressing cells contrasted against Parental  
 856 MCF10A cells. **d)** Gene Set Enrichment Analysis of published HIF1 $\alpha$  target genes for HAS2 or  
 857 HAS3 overexpressing cells. All results are not significant. (FDR q-values  $\geq 0.25$ ) **e)** Venn  
 858 diagram displaying the total number of significantly increased genes (FDR  $\leq 0.05$ ,  $\log_2(\text{Fold}$   
 859  $\text{Change}) \geq 1$ ) in either HAS2 or HAS3 overexpressing cells. The top 4 most significant genes  
 860 excluding HAS2/3 are shown in the table. **f)** Ranked enrichment analysis of a curated list of

861 migration and metabolism gene sets for tumors from the METABRIC cohort. The degree of  
862 enrichment is determined as the  $-\log_{10}(\text{p-value})$  multiplied by the sign of the difference in  
863 enrichment scores (ES) of patients stratified into either low or high enrichment of the HA  
864 overproduction gene signature. The dashed red line denotes the empirically determined cutoff for  
865 non-random enrichment. **g)** METABRIC patient survival probability predicted by the  
866 overlapping 72-gene signature of HA overexpressing cells. Patient signature scores were  
867 stratified into quartiles, and a log-rank test was used to determine statistical significance.
